# Supplementary material for: Management of periodontitis by three different approaches to non-surgical periodontal debridement – A randamized comparative clinical study
Source: Research Square preprint supplement (doi:10.21203/rs.3.rs-6712357/v1), 2025-06-04
Supplement: Supplementary file 2 [file f6647efabc42e4db249f05c8.xlsx]

## Sheet: Sheet1
Patient's no	Group	Age	Sex	Severity Stage	Grade	Time taken	Pre-T DPD %	Pre-T BS%	Post-T DPD %	Post-T BS%	Plaque Score 1st	2nd	3rd
1	1	43	1	2	3	50	26.4	68.6	1.96	4.9	80	43	20
2	1	42	2	3	3	40	36.66	58.3	2.77	11.11	96	36	22
3	1	86	2	3	3	30	20.3	50.9	1.85	11.11	78	22	20
4	1	36	1	3	3	50	33.8	65.5	2.15	6.4	100	25	30
5	1	59	1	3	3	20	34.1	45.2	3.9	10.3	59	32.9	29.5
6	1	43	2	3	3	25	60.8	63.4	11.5	25.3	50	25	24
7	1	40	2	3	2	20	19	34.1	1.5	7.1	95	23	12
8	1	43	1	3	3	35	23.11	67.74	5.91	4.84	56	25	21
9	1	60	1	2	2	30	58.4	60	3	8.4	75	30	12
10	1	57	2	3	3	30	39.6	69.5	2.3	10.3	62	42	38
11	1	36	2	3	3	60	44.8	43.6	4.6	8.6	55	8.6	8
12	1	35	1	2	3	20	14	75.8	0	9.7	89	56	28
13	1	39	2	3	3	60	61.9	68.4	4.16	8.9	95	30	20
14	1	55	1	2	3	30	40.7	51.8	0.92	4.6	84.7	12.5	13.8
15	1	51	2	3	2	35	31.06	45.4	2.27	3.78	45.4	29.5	26.1
16	2	49	1	3	3	30	10.3	38.5	6.4	19.2	69	43	30
17	2	52	2	3	3	40	48.2	84.2	30.7	35	100	25	23
18	2	68	2	3	2	35	12.7	100	4	26	66	18	15
19	2	35	2	2	2	40	14.6	59.7	6.25	24.3	77	33	12
20	2	51	1	3	2	20	6.8	40.1	2.2	9	32.6	53.6	52
21	2	40	1	2	2	35	40.4	66	8	24	66.3	41	20
22	2	53	2	3	3	50	83.3	65.4	1.2	15.5	100	17.8	15
23	2	58	2	3	3	25	17.24	17	2.3	14.6	63.7	36.2	22
24	2	40	1	3	3	40	41.66	51.56	3.1	10.9	79	35	16
25	2	37	1	3	3	40	33.9	73.2	4.16	20.8	88	29	18
26	2	62	1	2	2	30	23.8	11.9	0	8.7	100	25	19
27	2	61	1	3	3	25	30.4	52.9	13.7	20.6	57	30	25
28	2	62	1	3	2	30	7.9	36.2	2.2	7.2	88	80	60
29	2	50	2	3	2	40	26.6	47.3	15.3	25.3	93	28	12
30	2	36	1	3	3	60	30.3	48.2	7.7	17.8	69.6	30	15
31	3	59	2	3	3	80	50	83.9	35.2	53.7	79	55	20
32	3	56	2	3	3	60	61.5	89.7	37.2	64.1	99	53	33
33	3	59	1	3	2	80	40	75	24.2	39.2	100	44	28
34	3	62	2	3	3	80	40.4	89.2	26.1	57.1	96	30	25
35	3	45	1	3	3	80	50.6	76.6	26	40	93	25	15
36	3	68	1	3	2	60	19.6	78.4	11.7	32.3	66	35	32
37	3	58	1	2	2	50	26.5	43.2	18.2	23.5	92	48	32
38	3	46	2	3	3	40	10.7	40.3	5.4	9.7	100	50	30
39	3	44	1	3	3	80	62.9	68.5	28.3	30.8	73	22	10
40	3	42	2	2	2	80	20.83	26.7	2.38	8.9	51	35	28
41	3	38	1	3	3	40	39.78	41.9	4.83	15	51	36	27
42	3	36	1	2	2	50	66.6	68.8	15	18.8	100	27	20
43	3	57	1	3	3	30	10.86	40.6	4.3	10.86	94	30	25
44	3	45	1	3	3	80	43.5	83.3	22.2	23.1	94	20	18
45	3	45	2	3	3	60	15.8	97.6	9.5	15.8	86	80	20
Group 1- Full mouth disinfection
Group 2- Full mouth debridement
Group 3- Quadrandwise debridement
Sex 1- Female
Sex 2- Male
Severity stage I-1
Stage II-2
Stage III-3
Grade A-1
Grade B-2
Grade C-3
